# Supplementary material for: Theoretical study of the cis–trans isomerization mechanism of a pendant metal-bound azobenzene
Source: Royal Society of Chemistry journal article supplement (doi:10.1039/c6ra10880f), 2016-01-01

## Supporting Information

### Theoretical Study of the *cis-trans* Isomerization Mechanism of a Pendant Metal-bound Azobenzene

Ting-Ting Yin, Zeng-Xia Zhao\*, Hong-Xing Zhang\*

International Joint Research Laboratory of Nano-Micro Architecture Chemistry,  
Institute of Theoretical Chemistry, Jilin University, 130023 Changchun, China.

\*Corresponding author. Tel.: +86 18943121798

e-mail: zhaozx@jlu.edu.cn

**Table S1.** The absorption band energies of the *trans* and *cis* Re(CO)<sub>3</sub>-AB.

| methods               | <i>trans</i> |           |        |        |        | <i>cis</i> |           |        |        |        |
|-----------------------|--------------|-----------|--------|--------|--------|------------|-----------|--------|--------|--------|
|                       | B3LYP        | CAM-B3LYP | M06    | M06-2X | PBE0   | B3LYP      | CAM-B3LYP | M06    | M06-2X | PBE0   |
| $\lambda_{\max}$ (nm) | 541.56       | 451.34    | 452.49 | 489.98 | 512.56 | 531.05     | 446.90    | 518.53 | 442.77 | 446.79 |

**Table S2.** The test for different solvents in the current paper. (Bond length and bond angle are in Angstroms and Degrees)

| solvent      | <i>cis</i>                     |                                              |                                              |                                                             |              | <i>trans</i>                   |                                              |                                              |                                                             |              | $\Delta E_{zpe}/eV$ |
|--------------|--------------------------------|----------------------------------------------|----------------------------------------------|-------------------------------------------------------------|--------------|--------------------------------|----------------------------------------------|----------------------------------------------|-------------------------------------------------------------|--------------|---------------------|
|              | N <sub>1</sub> -N <sub>2</sub> | C <sub>5</sub> N <sub>1</sub> N <sub>2</sub> | N <sub>1</sub> N <sub>2</sub> C <sub>3</sub> | C <sub>5</sub> N <sub>1</sub> N <sub>2</sub> C <sub>3</sub> | E/a.u.       | N <sub>1</sub> -N <sub>2</sub> | C <sub>5</sub> N <sub>1</sub> N <sub>2</sub> | N <sub>1</sub> N <sub>2</sub> C <sub>3</sub> | C <sub>5</sub> N <sub>1</sub> N <sub>2</sub> C <sub>3</sub> | E/a.u.       |                     |
| gas phase    | 1.244                          | 124.4                                        | 124.3                                        | -9.1                                                        | -1793.080656 | 1.254                          | 114.9                                        | 115.3                                        | -179.7                                                      | -1793.104852 | 0.64                |
| hexane       | 1.244                          | 124.4                                        | 124.1                                        | -9.6                                                        | -1793.137890 | 1.253                          | 115.2                                        | 115.6                                        | -179.7                                                      | -1793.160777 | 0.62                |
| THF          | 1.245                          | 124.2                                        | 123.9                                        | -9.9                                                        | -1793.151971 | 1.254                          | 115.3                                        | 115.7                                        | -179.8                                                      | -1793.173843 | 0.59                |
| acetonitrile | 1.245                          | 124.1                                        | 123.9                                        | -10.0                                                       | -1793.157379 | 1.254                          | 115.4                                        | 115.7                                        | -179.9                                                      | -1793.178910 | 0.58                |
| water        | 1.245                          | 124.1                                        | 123.8                                        | -10.0                                                       | -1793.158249 | 1.254                          | 115.4                                        | 115.8                                        | -180.0                                                      | -1793.179727 | 0.58                |

Note:  $\Delta E$  is the relative energy with respect to the *trans*-S<sub>0</sub>.

**Table S3.** The test for different solvents for TS-inv-1. (Bond length and bond angle are in Angstroms and Degrees)

| <b>TS-inv-1</b> |           |             |             |                |
|-----------------|-----------|-------------|-------------|----------------|
| <b>solvent</b>  | $N_1-N_2$ | $C_5N_1N_2$ | $N_1N_2C_3$ | $E_{zpe}/a.u.$ |
| gas phase       | 1.221     | 117.1       | 179.6       | -1792.731271   |
| hexane          | 1.220     | 117.3       | 179.7       | -1792.741411   |
| THF             | 1.219     | 117.6       | 179.9       | -1792.802740   |
| acetonitrile    | --        | --          | --          | --             |
| water           | 1.220     | 117.6       | 179.6       | -1792.761667   |

**Fig. S1** Simulated absorption spectra of the *trans* Re(CO)<sub>3</sub>-AB based on the various functionals.

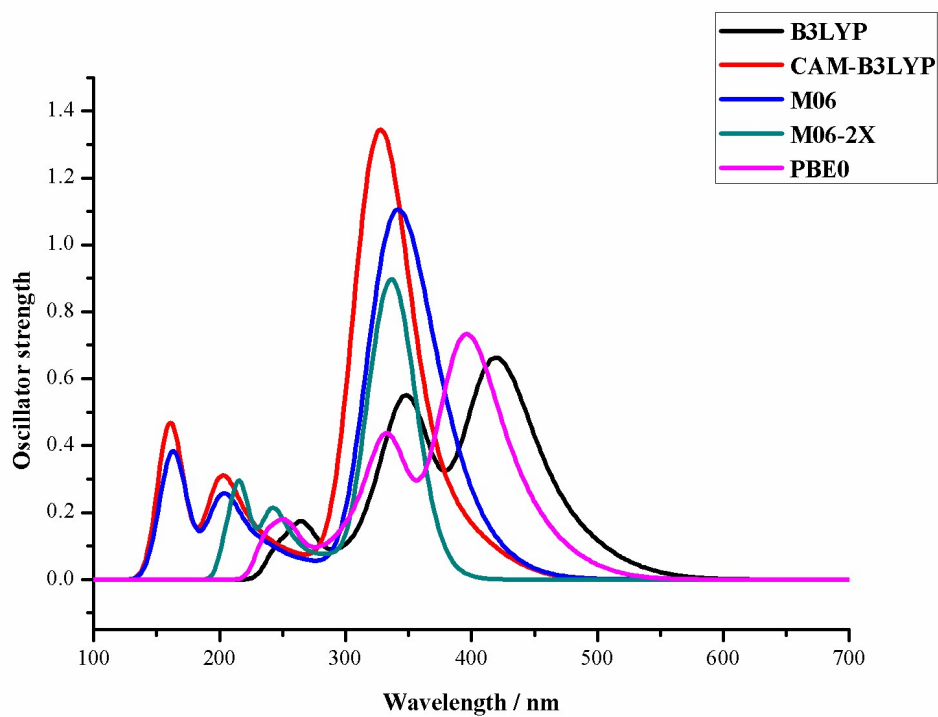

**Fig. S2** Potential energy profiles in the excited states for  $\text{Re}(\text{CO})_3\text{-AB}$  along the  $\text{C}_5\text{N}_1\text{N}_2$  inversion coordinate.

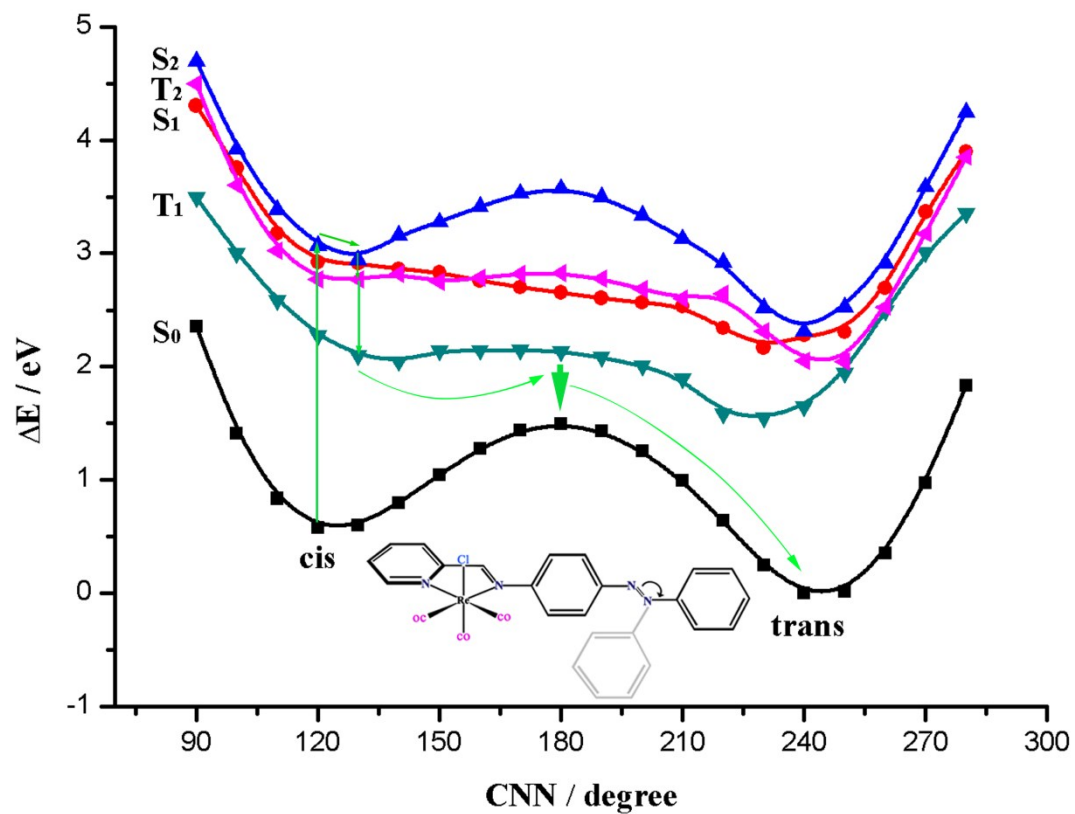

Supplement: c6ra10880f1.pdf [file c6ra10880f1.pdf]
